# Supplementary material for: Characterization of the Universal Flavor in Chinese Butter Hotpot by Multiple Mass Spectrometry Detection Technology
Source: Hindawi journal article supplement (doi:10.1155/2024/7500234), 2024-01-29
Supplement: f1 [file 7500234.f1.docx]

**Fig. S1 Chromatogram of hotpot detected by GC-Q-TOF/MS and GC-Orbitrap-MS.** Both GC-Q-TOF/MS and GC-Orbitrap-MS instruments were performed to characterize the volatile compounds of the HG-12 sample. In comparison to the method of GC-MS, GC-Q-TOF/MS and GC-Orbitrap-MS have the advantage of working with a high resolving power and mass accuracy, and are suitable for the exploration of unknown flavor compounds.

**Table S1 Formula and rough proportions of HG-12 hotpot sample**

| Ingredients | Contents /g | Specific spices |
| --- | --- | --- |
| Beef tallow | 1100 | *Foeniculum vuLgare Mill.* |
| Soybean oil | 500 | *Cuminum cyminum L.* |
| Chilli | 25 | *Thymus mongolicus Ronn* |
| Chilli (without seeds) | 65 | *Illicium verum Hook. f.* |
| Rock candy | 20 | *Amomum tsaoko Crevost et Lemarie* |
| Broad bean paste | 70 | *Amomum cardamon* |
| Fresh ginger | 35 | *Myristica fragrans* |
| Garlic | 20 | *Villous Amomum Fruit.* |
| Peppercorns | 40 | *Piper longum L.* |
| Spices | 57 | *Cinnamomum tamala (Bauch.-Ham.) Nees et Eberm* |
| Ethyl maltol | 5 | *Glycyrrhiza uralensis Fisch.* |
|  |  | *Eugenia caryophllata Thunb.* |
|  | | *Alpinia officinarum Hance* |
| *Kaempferia galanga Linn.* |
| Total | 1937 | *Laurus nobilis* |

Actually, the ingredients and proportions of the hotpot products were different and even a technical secret; thus, the flavor profiles of hotpots in different manufacturers showed distinctive features. To elucidate the flavor characteristics, one of the manufacturers presents a specific formula and its proportions (number as HG-12).

**Table S2 VIP values of the differential aroma compounds**

| Aroma compounds | VIP values |
| --- | --- |
| Linalool | 3.212 |
| Ethyl maltol | 3.132 |
| Anethole | 2.384 |
| D-Limonene | 2.246 |
| Linalyl acetate | 1.712 |
| Eucalyptol | 1.660 |
| Eugenol | 1.392 |
| Sabinene | 1.382 |
| beta-Phellandrene | 1.327 |
| Ethanol | 1.152 |
| beta-Myrcene | 1.055 |

The VIP (variable importance in projection) value of the aroma compound greater than 1 was generally recognized as the differential compound. The VIP value of each compound was calculated by PLS-DA (Partial Least Squares Discriminant Analysis).

Table S3 Sensory evaluation criteria of hotpot

| Item | Descriptors | Standard for evaluation  (1 ~ 9 scores) |
| --- | --- | --- |
| Appearance | Cloudy/clear; color tend to be yellow/ dark red/bright red | Colour and lustre |
| Flavor | Soy sauce-like, pepper-like, raw chili-like, cooked chili-like, burnt chili-like, spices, aroma of grease, meaty aroma, vegetable aroma, *etc*. | Chili-like, fatty and meaty aroma, soy sauce-like |
| Taste | Numb taste, spicy, meaty, bitter taste, sweet taste, salty, umami, *etc*. | Spicy and numb taste, salty and umami taste |

Six professional evaluators participated in the sensory evaluation of hotpots, which had the professional skills of sensory evaluation tests and accumulated a lot of descriptors of hotpots. Therefore, the criteria were set by those professional descriptors.

**Table S4 Volatile compounds of sample HG-12 detected by three detection methods**

| CAS | Compounds | GC-MS / % | GC-Q-TOF/MS / % | GC-Orbitrap-MS / % |
| --- | --- | --- | --- | --- |
| 999-61-1 | 2-Hydroxypropyl acrylate | ND | ND | 0.01 |
| 99-87-6 | p-Cymene | 0.534 | ND | ND |
| 99-86-5 | α-Terpinene | 0.003 | 0.25 | 0.067 |
| 99-85-4 | γ-Terpinene | 0.64 | 0.626 | 0.276 |
| 99-83-2 | α-Phellandrene | 0.167 | 3.813 | ND |
| 99-71-8 | 4-sec-Butylphenol | 0.09 | 0.029 | ND |
| 99-49-0 | Carvone | 0.083 | 0.06 | ND |
| 98816-47-8 | 4-[2-(2-Propenyl)-1,3-dioxolan-2-yl]-1H-pyrazole | ND | ND | 0.013 |
| 98-55-5 | α-Terpineol | ND | 0.6 | 0.403 |
| 98-06-6 | tert-Butylbenzene | 0.018 | ND | ND |
| 98-01-1 | Furfural | 0.368 | ND | ND |
| 98-00-0 | 2-Furanmethanol | 0.262 | 0.129 | ND |
| 97-64-3 | Ethyl lactate | 0.543 | 0.069 | ND |
| 97-53-0 | Eugenol | 3.576 | 0.027 | 9.725 |
| 96-48-0 | Butyrolactone | ND | 0.031 | 0.049 |
| 96-17-3 | 2-Methylbutanal | 0.262 | ND | 0.033 |
| 96-08-2 | Dipentene dioxide | 0.143 | ND | ND |
| 95-65-8 | 3,4-Xylenol | 0.001 | ND | ND |
| 95-55-6 | 2-Aminophenol | 0.016 | ND | ND |
| 95530-78-2 | 7-Oxabicyclo[2.2.1]hept-5-en-2-one | ND | ND | 0.011 |
| 95-01-2 | 2,4-Dihydroxybenzaldehyde | ND | ND | 0.026 |
| 94482-89-0 | (1R,3aR,4aR,8aR)-1,4,4,6-Tetramethyl-1,2,3,3a,4,4a,7,8-octahydrocyclopenta[1,4]cyclobuta[1,2]benzene | ND | 0.038 | ND |
| 93836-50-1 | delta-Terpineol acetate | 0.208 | ND | 0.107 |
| 937-61-1 | Propoxymethylbenzene | 0.002 | ND | ND |
| 93-58-3 | Methyl benzoate | 0.009 | ND | ND |
| 93-29-8 | 1-Acetoxy-2-methoxy-4-(1-propenyl)benzene | 0.003 | ND | ND |
| 93-28-7 | Eugenol Acetate | 0.513 | ND | ND |
| 93-15-2 | Methyleugenol | 0.013 | 0.019 | 0.044 |
| 930-60-9 | 4-Cyclopentene-1,3-dione | 0.023 | 0.013 | ND |
| 930-27-8 | 3-Methyl-furan | 0.006 | ND | ND |
| 92760-25-3 | 2,3-Dehydro-1,8-cineole | 0.002 | ND | ND |
| 927-49-1 | 6-Undecanone | 0.008 | ND | ND |
| 92-13-7 | Pilocarpine | ND | ND | 0.135 |
| 91-64-5 | Coumarin | 0.041 | ND | 0.016 |
| 91-10-1 | 2,6-Dimethoxyphenol | ND | ND | 0.008 |
| 90-24-4 | Xanthoxylin | 0.003 | ND | 0.02 |
| 90-05-1 | Guaiacol | 0.006 | ND | 0.013 |
| 89-83-8 | Thymol | 0.004 | ND | ND |
| 89-81-6 | Piperitone | 0.031 | ND | 0.054 |
| 889949-94-4 | 2-[(2-Furylmethyl)amino]-2-methyl-1-propanol | ND | 0.034 | ND |
| 88395-46-4 | Isospathulenol | 0.006 | ND | ND |
| 881-57-2 | 5-Formyl-2-methoxyphenyl acetate | ND | ND | 0.04 |
| 87-44-5 | Caryophyllene | 1.708 | ND | ND |
| 872-50-4 | 1-Methyl-2-pyrrolidinone | 0.042 | ND | 0.033 |
| 871-71-6 | N-Butyl-formamide | 0.006 | ND | ND |
| 85615-64-1 | (2Z,4Z,6E)-2,4,6-Undecatriene | 0.001 | ND | ND |
| 82608-03-5 | 2,3-Dimethylpentanoic acid | 0.024 | ND | ND |
| 823-82-5 | 2,5-Furandicarboxaldehyde | 0.014 | 0.004 | ND |
| 823-17-6 | 3,5-Dimethyl-cyclohexene | 0.001 | ND | ND |
| 821-55-6 | 2-Nonanone | 0.05 | ND | ND |
| 81944-08-3 | trans-Ligustilide | 0.042 | ND | 0.038 |
| 80-56-8 | α-Pinene | 0.209 | ND | ND |
| 80-26-2 | α-Terpinyl acetate | 1.394 | ND | 1.203 |
| 79-92-5 | Camphene | 0.021 | 0.645 | ND |
| 79-77-6 | β-Ionone | ND | ND | 0.022 |
| 79-20-9 | Methyl acetate | 0.01 | ND | ND |
| 79-09-4 | Propanoic acid | 0.079 | ND | 0.038 |
| 79-06-1 | 2-Propenamide | ND | ND | 6.681 |
| 78-94-4 | Methyl vinyl ketone | 0.008 | ND | ND |
| 78-93-3 | 2-Butanone | 0.016 | 0.048 | ND |
| 78-92-2 | 2-Butanol | 0.004 | ND | ND |
| 78-84-2 | Isobutyraldehyde | 0.15 | ND | 0.018 |
| 78-83-1 | Isobutanol | 0.059 | 0.027 | 0.02 |
| 78-70-6 | Linalool | 2.873 | 10.852 | 1.042 |
| 78431-28-4 | 2-[(Phenylamino)carnonyl)cyclohexanecarboxylic acid | ND | ND | 0.028 |
| 78259-41-3 | 1-(3-Methyl-2-butenoxy)-4-(1-propenyl)benzene | 0.023 | ND | 0.049 |
| 7787-20-4 | L-Fenchone | ND | ND | 0.208 |
| 7786-61-0 | 2-Methoxy-4-vinylphenol | ND | ND | 0.024 |
| 7785-70-8 | (1R)-2,6,6-Trimethylbicyclo[3.1.1]hept-2-ene | ND | ND | 0.173 |
| 7785-53-7 | (R)-(+)-α-terpineol | 0.876 | ND | ND |
| 76760-43-5 | (Z)-2-Methoxycinnamaldehyde | ND | ND | 0.029 |
| 767-58-8 | Methyl indane | 0.029 | ND | ND |
| 765-46-8 | Spiro[2,4]hepta-4,6-diene | ND | ND | 0.221 |
| 765-43-5 | Cyclopropyl methyl ketone | 0.006 | ND | ND |
| 76-22-2 | Camphor | ND | 0.045 | ND |
| 761-65-9 | N,N-Dibutylformamide | ND | ND | 0.01 |
| 76003-37-7 | 2-Methyl-acrylic acid 3-methyl-2-methylene-but-3-enyl ester | 0.013 | ND | ND |
| 75-50-3 | Trimethylamine | 0.042 | ND | ND |
| 75-18-3 | Dimethyl sulfide | 0.006 | ND | ND |
| 75-15-0 | Carbon disulfide | 0.007 | ND | 0.018 |
| 75-07-0 | Acetaldehyde | 0.146 | ND | ND |
| 75-05-8 | Acetonitrile | ND | ND | 0.093 |
| 74-93-1 | Methanethiol | 0.042 | ND | ND |
| 74-87-3 | Chloromethane | 0.003 | ND | ND |
| 74793-12-7 | Furosemide Impurity | ND | ND | 0.031 |
| 74744-31-3 | (E)-5-Undecen-3-yne | 0.014 | ND | ND |
| 74630-52-7 | (E)-6-Methylundec-3-ene | ND | ND | 0.015 |
| 74421-09-3 | (3S)-1,1,3-Trimethyl-3-(2-methylprop-2-enyl)cyclopentane | ND | 0.012 | ND |
| 7399-49-7 | o-Isopropenyltoluene | 0.028 | ND | ND |
| 7392-19-0 | (+/-)-Linaloyl oxide | 0.033 | ND | ND |
| 7390-81-0 | 1,2-Epoxyoctadecane | ND | ND | 0.003 |
| 73209-42-4 | trans-Calamenene | 0.024 | ND | ND |
| 7299-42-5 | 2-(4-Methylidenecyclohexyl)propan-2-ol | 0.128 | ND | ND |
| 72917-31-8 | Z-Butylidenephthalide | 0.016 | ND | ND |
| 72257-53-5 | (2,2,4-Trimethyl-3-oxabicyclo[2.2.2]octan-5-yl) acetate | 0.032 | ND | ND |
| 7216-56-0 | (4E,6Z)-2,6-Dimethylocta-2,4,6-triene | ND | 0.182 | ND |
| 7212-40-0 | (+)-p-Mentha-2,8-dien-1-ol | 0.069 | ND | 0.018 |
| 72047-70-2 | Dihydroscutianin H | ND | ND | 0.036 |
| 71-41-0 | 1-Pentanol | 0.021 | ND | ND |
| 71-23-8 | 1-Propanol | 0.037 | ND | ND |
| 7040-58-6 | Bis(1,2,2-trimethylpropyl) methylphosphonate | ND | ND | 0.009 |
| 698-76-0 | 1,5-Octalactone | 0.026 | ND | ND |
| 693-80-1 | Octadec-9-enyl acetate | ND | ND | 0.007 |
| 693-54-9 | 2-Decanone | 0.046 | ND | ND |
| 687-47-8 | Ethyl L(-)-lactate | ND | ND | 0.547 |
| 68317-77-1 | 1-Methyl-cyclopent-2-encarbonsaeure | ND | ND | 0.159 |
| 67-71-0 | Dimethyl sulfone | 0.006 | ND | 0.015 |
| 67690-48-6 | Sabinone | ND | ND | 0.009 |
| 67-64-1 | Acetone | 0.138 | ND | 0.094 |
| 675-20-7 | 2-Piperidinone | 0.051 | 0.011 | ND |
| 6750-60-3 | 10-Apocarotenal | ND | ND | 0.003 |
| 67-47-0 | 5-Hydroxymethylfurfural | 0.184 | 0.038 | 0.213 |
| 673-84-7 | 2,6-Dimethyl-2,4,6-octatriene | 0.07 | 0.026 | 0.026 |
| 6728-26-3 | (E)-2-Hexenal | 0.045 | ND | ND |
| 66737-12-0 | N,N'-Bis(2,6-dimethyl-6-nitrosohept-2-en-4-one) | ND | ND | 0.035 |
| 66407-26-9 | 4,7-Dimethyl-4,4a,5,6-tetrahydrocyclopenta[c]pyran-1,3-dione | ND | ND | 0.487 |
| 66-25-1 | Hexanal | 0.106 | ND | 0.118 |
| 65-85-0 | Benzoic acid | ND | 0.029 | ND |
| 65293-09-6 | p-Mentha-1(7),2-dien-8-ol | 0.007 | ND | ND |
| 6485-40-1 | (-)-Carvone | ND | ND | 0.017 |
| 644-30-4 | α-Curcumene | 0.052 | 0.257 | ND |
| 64-19-7 | Acetic acid | 5.46 | 0.826 | 4.8 |
| 64-18-6 | Formic acid | ND | ND | 0.131 |
| 6418-41-3 | 3-Methyltridecane | 0.047 | 0.052 | ND |
| 64-17-5 | Ethanol | 14.27 | 26.799 | ND |
| 63922-61-2 | 6,6,7-Trimethyloct-3-yne-2,5-dione | 0.006 | ND | ND |
| 635-51-8 | DL-Phenylsuccinic acid | ND | ND | 0.024 |
| 632-16-6 | 2,3-Dimethylthiophene | 0.002 | ND | ND |
| 632-15-5 | 3,4-Dimethylthiophene | 0.015 | ND | ND |
| 6317-85-7 | 4-Dimethylaminobenzoin | 0.017 | ND | ND |
| 629-62-9 | Pentadecane | 0.075 | ND | ND |
| 629-59-4 | Tetradecane | 0.208 | ND | ND |
| 629-50-5 | Tridecane | 0.05 | ND | ND |
| 629-19-6 | Disulfide, dipropyl | 0.024 | ND | ND |
| 628-97-7 | Ethyl palmitate | 0.003 | ND | ND |
| 62850-21-9 | 3,4-Ditert-butyl-2,2,5,5-tetramethylhexane | 0.011 | ND | ND |
| 626-89-1 | 4-Methyl-1-pentanol | ND | ND | 0.007 |
| 626-33-5 | 2-Methyl-4-heptanone | 0.002 | ND | ND |
| 625-33-2 | 3-Penten-2-one | 0.008 | ND | ND |
| 624-92-0 | Dimethyl disulfide | 0.007 | ND | ND |
| 62488-52-2 | 3-Vinyl-1,2-dithiacyclohex-4-ene | ND | 0.464 | ND |
| 624-15-7 | 3,7-Dimethyl-2,6-octadien-1-ol | ND | ND | 0.01 |
| 622-39-9 | 2-Propylpyridine | 0.018 | ND | ND |
| 62238-24-8 | 2,5-Dimethyl-6-methylidenespiro[2.4]heptane | ND | ND | 2.22 |
| 62238-12-4 | 2,3,6-Trimethyl-decane | 0.027 | ND | ND |
| 62183-79-3 | 2,2,4,4-Tetramethyloctane | ND | ND | 0.01 |
| 62181-91-3 | (1R,3S,4R,5S)-1-Isopropyl-4-methylbicyclo[3.1.0]hexan-3-yl acetate-rel- | ND | ND | 0.482 |
| 621-58-9 | 3-hydroxy-4-methoxystyrene | 0.027 | 0.019 | ND |
| 620-02-0 | 5-Methyl furfural | 0.07 | 0.079 | 0.09 |
| 619-62-5 | 4-Isopropyl-1-methylcyclohex-2-enol | ND | ND | 0.01 |
| 6175-49-1 | 2-Dodecanone | 0.005 | ND | ND |
| 6165-40-8 | 7-Methylpentadecane | ND | ND | 0.07 |
| 616-45-5 | 2-Pyrrolidinone | ND | 0.02 | ND |
| 6145-73-9 | Tris(2-chloropropyl) phosphate | ND | 0.029 | ND |
| 613-94-5 | Benzoyl hydrazine | ND | 0.003 | ND |
| 61141-74-0 | 4-Hydroxy-5-methyl-3-propylhexan-2-one | ND | ND | 0.264 |
| 60-35-5 | Acetamide | 0.025 | ND | ND |
| 60134-80-7 | N-Methyl-N-[2-(N-methylprop-2-enamido)ethyl]prop-2-enamide | ND | ND | 0.004 |
| 60-12-8 | Phenylethyl Alcohol | 0.075 | ND | 0.146 |
| 600-22-6 | Methyl pyruvate | ND | 0.037 | ND |
| 5989-27-5 | D-Limonene | 3.203 | 4.818 | ND |
| 598-61-8 | Methylcyclobutane | ND | ND | 0.012 |
| 595-37-9 | 2,2-Dimethylbutyric acid | 0.001 | ND | ND |
| 5949-05-3 | (S)-(-)-Citronellal | 0.04 | ND | ND |
| 5932-68-3 | trans-Isoeugenol | 0.111 | ND | 0.118 |
| 59320-77-3 | (6E)-8-Methyl- 6-nonenoic acid | 0.015 | ND | ND |
| 593-08-8 | 2-Tridecanone | 0.272 | 0.029 | 0.021 |
| 591-31-1 | 3-Methoxybenzaldehyde | 0.056 | 0.07 | ND |
| 5911-04-6 | 3-Methylnonane | 0.009 | ND | ND |
| 5910-89-4 | 2,3-Dimethylpyrazine | 0.001 | ND | ND |
| 5910-85-0 | (E, E)-2,4-Heptadienal | ND | 0.057 | ND |
| 590-86-3 | 3-Methylbutanal | 0.684 | ND | 0.064 |
| 589-62-8 | 4-Octanol | 0.003 | ND | ND |
| 589-34-4 | 3-Methylhexane | ND | ND | 0.048 |
| 586-81-2 | 1-methyl-4-propan-2-ylidenecyclohexan-1-ol | 0.925 | ND | ND |
| 586-62-9 | Terpinolene | 0.126 | ND | 0.051 |
| 58422-90-5 | 1,3-Dioxolane-2-heptanenitrile, .alpha.-methyl-.sigma.-oxo-2-phenyl- | ND | ND | 0.023 |
| 58372-16-0 | 3,4-Dimethylcyclopentanone | ND | ND | 0.015 |
| 5780-40-5 | (1Z)-N-Hydroxy-3-methyl-1-butanimine | 0.01 | ND | ND |
| 57295-30-4 | 3-Hydroxy-4-methylbenzaldehyde | 0.002 | ND | ND |
| 57194-69-1 | (Z)-3-Phenylacrylaldehyde | 0.119 | ND | ND |
| 57129-54-1 | α-Thujenal | ND | 0.039 | 0.006 |
| 56862-62-5 | 10-Methylnonadecane | ND | ND | 0.016 |
| 56767-19-2 | 5-Isopropyl-2(5H)-furanone | 0.03 | ND | ND |
| 56606-79-2 | 1-Decen-3-one | 0.014 | ND | ND |
| 565-62-8 | 3-Methyl-3-penten-2-one | 0.003 | ND | ND |
| 5655-61-8 | L-Bornyl acetate | 0.03 | ND | 0.032 |
| 56438-08-5 | (1E/Z)-Acetic acid dodec-1-enyl ester | 0.008 | ND | ND |
| 56335-71-8 | 1-Acetyl-3-ethylcyclobutan | 0.005 | ND | ND |
| 56318-84-4 | 5-Pentylcyclohexa-1,3-diene | 0.047 | ND | 0.017 |
| 563-16-6 | 3,3-Dimethyihexane | 0.001 | ND | ND |
| 562-74-3 | Terpinen-4-ol | 0.506 | 0.254 | ND |
| 55955-53-8 | trans-4-Hydroxy-3-methyl-6-(1-methylethyl)-2-cyclohexen-1-one | 0.05 | ND | 0.011 |
| 55927-39-4 | 5-Hydroxy-7-methoxy-2-methyl-3-phenyl-chromen-4-one | ND | 0.038 | ND |
| 55722-60-6 | cis-Chrysanthenol | ND | ND | 0.166 |
| 5561-05-7 | 2-n-Butyl-2-cyclopentenone | ND | ND | ND |
| 55314-57-3 | 2-Pentynoic acid ethyl ester | ND | ND | 0.05 |
| 55168-28-0 | 4-Hexylphenyl acetate | ND | ND | 0.009 |
| 55153-12-3 | Phenacyl formate | ND | 0.029 | ND |
| 54966-20-0 | rac-N-formylpipecolinic acid | ND | ND | 0.027 |
| 54911-85-2 | 4-(Oxan-2-yloxy)butanal | ND | 0.034 | ND |
| 54889-57-5 | cis-1,3,2-Oxazaborolidine-4-carboxylic acid, 2-butyl-5-methyl-methyl ester | ND | ND | 0.005 |
| 546-80-5 | Thujone | ND | 0.258 | ND |
| 546-79-2 | Sabinene hydrate | ND | ND | 0.09 |
| 544-63-8 | Tetradecanoic acid | 0.138 | ND | ND |
| 54324-03-7 | Bicyclosesquiphellandrene | ND | ND | 0.109 |
| 540-67-0 | Methyloxyethane | ND | ND | 7.324 |
| 54060-30-9 | m-Aminophenylacetylene | ND | 0.009 | ND |
| 539-52-6 | 3-(4-Methylpent-3-enyl)furan | 0.067 | ND | ND |
| 539-32-2 | 3-Butylpyridine | 0.002 | ND | ND |
| 5392-40-5 | Citral | ND | ND | 0.065 |
| 53907-62-3 | 2,3,3,4-Tetramethyl-cyclobutanon | 0.007 | ND | ND |
| 538-68-1 | Phenylpentane | ND | ND | 0.019 |
| 536-60-7 | p-Cymen-7-ol | 0.013 | ND | 0.012 |
| 53404-49-2 | 2,3-Pinandiol | ND | ND | 0.023 |
| 5332-88-7 | 1,3-Dimethylbutyl butyrate | 0.009 | ND | ND |
| 53119-25-8 | 1-Thiophen-2-ylpentan-1-one | ND | ND | ND |
| 529-20-4 | o-Tolualdehyde | 0.005 | ND | ND |
| 5286-38-4 | 1,2-Epoxy-p-menthan-3-on | 0.041 | ND | ND |
| 527-84-4 | o-Cymene | ND | 0.334 | 1.774 |
| 52687-81-7 | 2-Phenoxypropanal | ND | 0.023 | ND |
| 52254-38-3 | 2-Methyl-1-tetradecene | 0.144 | ND | ND |
| 51945-98-3 | 1,5-Heptadiene-3,4-diol | ND | ND | 0.013 |
| 51932-70-8 | Indan-4-carbaldehyde | ND | ND | 0.028 |
| 51911-82-1 | 4,8-Dimethyl-1,3,7-nonatriene | ND | ND | 0.006 |
| 515-13-9 | β-Elemene | 0.098 | ND | ND |
| 515-00-4 | (-)-Myrtenol | ND | 0.061 | ND |
| 513-86-0 | Acetoin | 0.053 | 0.03 | 0.039 |
| 513-85-9 | 2,3-Butanediol | ND | ND | 0.747 |
| 51276-34-7 | (E)-2,6-Dimethylocta-3,7-diene-2,6-diol | 0.095 | ND | 0.028 |
| 512-61-8 | (-)-1,7-Dimethyl-7-(4-methyl-3-pentenyl)-tricyclo[2.2.1.0(2,6)]heptane | ND | ND | 0.007 |
| 51208-43-6 | 1,2-Bis(4-methoxyphenyl)ethane-1,2-diamine | ND | ND | 0.052 |
| 51099-55-9 | Ethyl 5-ethoxy-3,4-dihydro-2H-pyrrole-2-carboxylate | ND | ND | 0.015 |
| 507-70-0 | endo-Borneol | ND | 0.104 | ND |
| 50639-02-6 | 2-Methyl-5-undecanone | ND | ND | 0.006 |
| 5062-30-6 | Phenacylidene diacetate | ND | ND | 0.38 |
| 5058-19-5 | 2-Butylpyridine | ND | 0.064 | ND |
| 505-57-7 | 2-Hexenal | ND | ND | 0.029 |
| 504-15-4 | Orcinol | ND | 0.024 | ND |
| 503-93-5 | 2,6,6-trimethylcyclohepta-2,4-dien-1-one | 0.036 | ND | ND |
| 503-74-2 | Isovaleric acid | ND | 0.03 | 0.031 |
| 503-64-0 | Isocrotonic acid | ND | ND | 0.01 |
| 50277-34-4 | β-Calacorene | 0.01 | ND | ND |
| 501-92-8 | Chavicol | 0.048 | ND | ND |
| 501-52-0 | Hydrocinnamic acid | ND | 0.01 | ND |
| 500-66-3 | Olivetol | ND | ND | 0.008 |
| 500-02-7 | 4-(1-Methylethyl)-2-cyclohexen-1-one | 0.118 | ND | 0.061 |
| 499-97-8 | 1-Methylidene-4-prop-1-en-2-ylcyclohexane | 0.018 | ND | ND |
| 498-60-2 | 3-Furaldehyde | ND | 0.222 | 1.138 |
| 497-23-4 | 2(5H)-Furanone | ND | ND | 0.018 |
| 496-16-2 | 2,3-Dihydrobenzofuran | ND | 0.008 | ND |
| 49615-54-5 | Allophanic acid phenyl ester | ND | ND | 0.015 |
| 495-61-4 | (S)-β-Bisabolene | 0.189 | 0.172 | ND |
| 495-60-3 | Zingiberene | 0.217 | 0.45 | ND |
| 494-90-6 | Menthofuran | 0.002 | ND | ND |
| 4940-11-8 | Ethyl maltol | 12.392 | 1.536 | ND |
| 4889-83-2 | 3,6,6-Trimethyl-bicyclo(3.1.1)hept-2-ene | ND | 0.38 | ND |
| 487-69-4 | 2,4-Dihydroxy-6-methylbenzaldehyde | ND | 0.004 | ND |
| 483-78-3 | Cadalin | 0.002 | ND | ND |
| 4830-99-3 | 1-Ethylindane | ND | 0.008 | ND |
| 4821-04-9 | 4-Terpinenyl acetate | 0.063 | 0.078 | ND |
| 4780-14-7 | 2-Methyl-3-methoxy-4H-pyran-4-one | 0.044 | 0.003 | 0.02 |
| 4748-78-1 | 4-Ethylbenzaldehyde | 0.003 | ND | ND |
| 471-15-8 | (+)-β-Thujone | ND | 0.237 | ND |
| 471-01-2 | 3,5,5-Trimethylcyclohex-3-en-1-one | 0.017 | ND | ND |
| 470-82-6 | Eucalyptol | 5.729 | 6.892 | 4.334 |
| 469-61-4 | (−)-α-Cedrene | 0.075 | ND | ND |
| 4694-12-6 | 2,4,4-Trimethylcyclopentan-1-one | 0.01 | ND | ND |
| 4673-31-8 | 3-Propylyridin | 0.001 | ND | ND |
| 464-49-3 | (+)-2-Bornanone | ND | ND | 0.01 |
| 451-55-8 | ar-Curcumen | ND | 0.04 | ND |
| 4480-83-5 | 1,4-Dioxane-2,6-dione | ND | ND | 0.29 |
| 4412-91-3 | 3-Furanmethanol | ND | ND | 0.175 |
| 4411-89-6 | 2-Phenyl-2-butenal | 0.011 | ND | ND |
| 4313-03-5 | (E,E)-2,4-Heptadienal | 0.275 | ND | ND |
| 431-03-8 | 2,3-Butanedione | 0.004 | ND | ND |
| 4265-25-2 | 2-Methylbenzofuran | 0.007 | ND | ND |
| 4254-15-3 | (S)-(+)-1,2-Propanediol | 0.325 | ND | 0.333 |
| 4229-91-8 | 2-Propylfurane | ND | 0.077 | ND |
| 420-12-2 | Thiirane | 0.001 | ND | ND |
| 41977-38-2 | 1,1-Dimethyl-2-nonylcyclopropane | 0.004 | ND | ND |
| 41977-35-9 | 1-Butyl-2-isobutylcyclopropane | 0.016 | ND | ND |
| 4179-38-8 | 2-n-Octylfuran | 0.018 | ND | 0.019 |
| 4170-30-3 | 2-Butenal | 0.003 | ND | ND |
| 41044-63-7 | trans-2-Methylhepta-1,5-diene | 0.003 | ND | ND |
| 40716-66-3 | Nerolidol | ND | ND | 0.014 |
| 3913-81-3 | (E)-2-Decenal | 1.774 | 0.317 | 0.148 |
| 3885-29-8 | 4-Methoxycarbonyl-4-butanolide | ND | 0.006 | ND |
| 3857-25-8 | (5-Methylfuran-2-yl)methanol | 0.018 | ND | 0.008 |
| 3856-25-5 | Copaene | 0.592 | ND | 0.368 |
| 3796-70-1 | Geranyl acetone | 0.012 | ND | ND |
| 3779-61-1 | (E)-Ocimene | 0.363 | ND | 0.317 |
| 3777-71-7 | 2-n-Heptylfuran | 0.02 | ND | ND |
| 3777-70-6 | 2-Hexyl-furan | ND | 0.03 | 0.017 |
| 3777-69-3 | 2-Pentyl-furan | 0.025 | 0.036 | 0.12 |
| 3760-54-1 | 1-Pyrrolidinecarboxaldehyde | 0.025 | ND | ND |
| 3739-64-8 | Allyl butyl ether | ND | 0.246 | ND |
| 37050-03-6 | 3,4-Nonadiene | ND | ND | 0.02 |
| 3691-12-1 | α-Guaiene | ND | 0.016 | ND |
| 368-16-1 | 3-Methyl-L-histidine | ND | ND | 0.004 |
| 3658-80-8 | Dimethyl trisulfide | 0.009 | 0.011 | 0.013 |
| 3658-77-3 | Furaneol | ND | 0.037 | 0.019 |
| 3647-38-9 | 2-n-Propylaziridine | ND | 0.01 | ND |
| 36431-60-4 | 5-Ethylcyclopent-1-enecarboxaldehyde | 0.047 | ND | ND |
| 3637-01-2 | 3',4'-Dimethylacetophenone | ND | 0.007 | ND |
| 35852-42-7 | 4-Methylpentyl 4-methylpentanoate | 0.043 | ND | 0.006 |
| 35852-40-5 | 4-Methylpentyl 2-methylbutanoate | 0.034 | 0.014 | 0.009 |
| 34246-57-6 | 3-Isopropylbenzaldehyde | ND | 0.016 | ND |
| 34246-54-3 | 3-Ethylbenzaldehyde | ND | 0.032 | ND |
| 34135-85-8 | 3-(Methyltrisulfanyl)prop-1-ene | ND | 0.105 | ND |
| 34061-75-1 | 4-Propoxy-but-1-ene | ND | 0.009 | ND |
| 33931-80-5 | Propane-1,1-diol diacetate | ND | ND | 0.031 |
| 3391-86-4 | 1-Octen-3-ol | ND | ND | 0.014 |
| 33880-83-0 | (-)-β-Elemene | ND | 0.057 | ND |
| 3387-41-5 | Sabinene | 0.78 | 1.66 | 1.857 |
| 334-48-5 | n-Decanoic acid | 0.413 | 0.041 | 0.079 |
| 3338-55-4 | (Z)-β-Ocimene | ND | 0.233 | 0.115 |
| 3310-02-9 | (Z)-Sabinol | 0.068 | ND | ND |
| 32318-87-9 | 2-Acetyl-2-methyltetrahydrofuran | ND | 0.004 | ND |
| 3208-16-0 | 2-Ethylfuran | 0.013 | ND | 0.015 |
| 32064-79-2 | 6-Decen-5-one | 0.001 | ND | ND |
| 312916-81-7 | Carbamic acid, N-(2-carbamoyloxyethyl)-, 4-methoxyphenyl ester | ND | ND | 0.015 |
| 311351-17-4 | (2S,6R)-2,6-Dimethyl-2-(2-(4-methylfuran-3-yl)ethyl)cyclohexanone | ND | ND | 0.011 |
| 31081-18-2 | 3-Methyl-5-propylnonane | 0.002 | ND | ND |
| 31043-74-0 | Dimethylsulfoxonium formylmethylide | ND | ND | 0.063 |
| 30689-78-2 | (R)-(-)-(Z)-14-Methyl-8-hexadecen-1-ol | ND | ND | 0.003 |
| 30669-47-7 | 1-Phenyl-1-nonen-3-one | 0.011 | ND | ND |
| 3054-92-0 | 2,3,4-Trimethylpentan-3-ol | ND | ND | 0.008 |
| 3050-69-9 | n-Caproic acid vinyl ester | 0.003 | ND | ND |
| 30460-92-5 | Pinocarvone | 0.014 | ND | ND |
| 30361-29-6 | (E,E)-2,4-Undecadienal | 0.045 | ND | ND |
| 302566-41-2 | 4-Acetyl-3-hydroxy-5-(3-nitrophenyl)-1-[2-(1-piperazinyl)ethyl]-Pyrrol-2(5H)-one | ND | ND | 0.023 |
| 300-87-8 | 3,5-Dimethyl-1,2-oxazole | 0.01 | ND | ND |
| 300799-15-9 | 2,2-Biphenylene dicinnamate | ND | ND | 0.117 |
| 30021-74-0 | γ-Muurolene | 0.054 | ND | ND |
| 29873-99-2 | γ-Elemene | 0.006 | ND | ND |
| 29837-12-5 | Cubenene | ND | 0.036 | 0.035 |
| 29812-79-1 | O-Decylhydroxylamine | ND | ND | 0.015 |
| 29803-82-5 | 1-Methyl-4-(1-methylethyl)-2-cyclohexen-1-ol | 0.01 | ND | 0.054 |
| 29798-72-9 | 3-Butyl-2-hydroxy-2-cyclopenten-1-one | ND | ND | 0.019 |
| 29393-32-6 | 5-Acetyloxolan-2-one | ND | 0.009 | ND |
| 2922-51-2 | 2-Heptadecanone | 0.053 | ND | ND |
| 2918-13-0 | 1-Hepten-3-one | 0.008 | ND | ND |
| 29050-33-7 | (+)-4-Carene | 0.368 | ND | ND |
| 288-26-6 | 3H-1,2-Dithiole | ND | 0.093 | ND |
| 288-16-4 | Isothiazole | ND | ND | ND |
| 2867-05-2 | α-Thujene | 0.099 | ND | ND |
| 28564-83-2 | 2,3-Dihydro-3,5-dihydroxy-6-methyl-4H-pyran-4-one | 0.103 | 0.069 | 0.165 |
| 2834-00-6 | 2-Pentadecyn-1-ol | ND | ND | 0.094 |
| 2815-57-8 | 1,2,3-Trimethylcyclopentane | 0.003 | ND | ND |
| 2785-89-9 | 4-Ethyl-2-methoxyphenol | 0.006 | ND | 0.056 |
| 27831-13-6 | 4-Ethenyl-1,2-dimethylbenzene | ND | 0.037 | ND |
| 2765-11-9 | Pentadecanal | 0.078 | ND | ND |
| 267665-20-3 | (1S,4S,4aS)-1-Isopropyl-4,7-dimethyl-1,2,3,4,4a,5-hexahydronaphthalene | ND | ND | 0.038 |
| 267650-23-7 | 10,13-Dimethyl-tetradecanoic acid methyl ester | ND | 0.004 | ND |
| 2645-39-8 | 1,3-Diphenyl-1-(phenylcarbamoyl)urea | ND | ND | 0.074 |
| 26186-00-5 | 1-Heptadecyne | ND | ND | 0.004 |
| 25905-14-0 | Acetic acid 2-isopropenyl-5-methyl-4-hexen-1-yl ester | 0.197 | ND | ND |
| 25893-50-9 | (2E)-N-(2-Fluorophenyl)-3-phenyl-2-propenamide | ND | ND | 0.023 |
| 2588-51-4 | Butyl piperidino sulfone | ND | ND | 0.042 |
| 25679-28-1 | cis-Anethole | ND | ND | 0.123 |
| 2548-87-0 | (E)-2-Octenal | 0.402 | 0.088 | 0.072 |
| 2524-52-9 | Ethyl pyridine-2-carboxylate | ND | ND | 0.016 |
| 25201-40-5 | 4-Methyl-1,6-heptadien-4-ol | 0.027 | ND | ND |
| 25152-84-5 | (E,E)-2,4-Decadienal | 2.026 | 0.243 | 0.732 |
| 25152-83-4 | (E,Z)-2,4-Decadienal | ND | 0.042 | 0.136 |
| 25117-24-2 | 4-Methyl-tetradecane | 0.007 | ND | 0.013 |
| 24703-35-3 | (1S,2E,6E,10R)-3,7,11,11-Tetramethylbicyclo[8.1.0]undeca-2,6-diene | ND | ND | 0.019 |
| 2463-77-6 | 2-Undecenal | 1.04 | 0.14 | ND |
| 24347-58-8 | [R-(R*,R*)]-2,3-Butanediol | 0.896 | ND | ND |
| 242794-76-9 | 2-Methylene-4,8,8-trimethyl-4-vinylbicyclo[5.2.0]nonane | ND | ND | 0.711 |
| 24254-54-4 | 4-Methyl-1,3-oxathiolane | 0.001 | ND | ND |
| 241123-18-2 | cis-Chrysanthenyl formate | ND | ND | 0.078 |
| 2396-65-8 | 1,8-Nonadiyne | ND | ND | 0.584 |
| 23838-25-7 | (E)-1-Methyl-3-(prop-1-en-1-yl)trisulfane | ND | ND | 0.043 |
| 23838-21-3 | (E)-1-(Prop-1-en-1-yl)-2-propyldisulfane | 0.02 | ND | ND |
| 23838-20-2 | (Z)-1-(Prop-1-en-1-yl)-2-propyldisulfane | 0.006 | ND | ND |
| 23838-19-9 | (E)-1-Methyl-2-(prop-1-en-1-yl)disulfane | 0.008 | ND | 0.011 |
| 23838-18-8 | (Z)-1-Methyl-2-(prop-1-en-1-yl)disulfane | 0.002 | ND | ND |
| 23708-56-7 | 6-Undecanol | 0.007 | ND | ND |
| 2345-28-0 | 2-Pentadecanone | 0.2 | ND | ND |
| 2305-05-7 | γ-Dodecalactone | 0.199 | 0.022 | 0.121 |
| 22868-76-4 | 2,5-Dimethylpyrimidine | 0.012 | ND | ND |
| 22381-86-8 | 2-Undecen-4-ol | 0.003 | ND | ND |
| 22381-86-8 | 2-Undecen-4-ol | 0.002 | ND | ND |
| 2223-54-3 | 3,3,6,6-Tetramethylcyclohexa-1,4-diene | ND | ND | 0.03 |
| 22228-41-7 | α-Phenyl-γ-benzoyl-butyronitril | ND | ND | 0.007 |
| 2213-23-2 | 2,4-Dimethyl-heptane | ND | ND | 0.094 |
| 2179-57-9 | Diallyl disulphide | ND | 0.601 | ND |
| 21473-37-0 | trans-Ascaridol glycol | ND | ND | 0.008 |
| 21399-13-3 | N-Acetyl-3-pyrroline | 0.015 | ND | ND |
| 21391-99-1 | α-Calacorene | 0.007 | ND | 0.011 |
| 21195-59-5 | p-Mentha-1,5,8-triene | 0.003 | ND | ND |
| 2100-17-6 | 4-Pentenal | 0.018 | ND | ND |
| 2082-59-9 | Valeric anhydride | 0.046 | ND | ND |
| 20461-31-8 | 2-Methylene cyclopentanol | ND | ND | 0.141 |
| 20307-83-9 | β-Sesquiphellandrene | 0.11 | 0.126 | 0.007 |
| 20279-44-1 | Butyl 2-oxopropanoate | ND | ND | 0.008 |
| 2021-28-5 | Ethyl 3-phenylpropanoate | ND | 0.008 | ND |
| 20126-76-5 | (-)-Terpinen-4-ol | ND | ND | 0.203 |
| 19945-61-0 | (E)-4,8-Dimethylnona-1,3,7-triene | 0.025 | ND | ND |
| 19895-35-3 | 6-Ethyl-5,6-dihydro-2H-pyran-2-one | ND | 0.013 | ND |
| 19876-45-0 | p-Mentha-1,5-dien-7-ol | 0.017 | ND | ND |
| 19687-22-0 | 4-Methyl-2,4,6-tri-tert-butylcyclohexa-2,5-dien-1-one | ND | 0.013 | ND |
| 1963-36-6 | 4-Methoxycinnamaldehyde | 0.004 | ND | ND |
| 19615-27-1 | 1-(3,4-Dihydro-2H-pyridin-1-yl)ethanone | 0.004 | ND | ND |
| 1940-19-8 | 1-Ethenylcyclohexan-1-ol | 0.004 | ND | ND |
| 19329-89-6 | Isoamyl lactate | 0.001 | ND | ND |
| 19322-27-1 | 4-Hydroxy-5-methyl-3-furanone | 0.071 | 0.022 | ND |
| 19132-06-0 | [S-(R*,R*)]-2,3-Butanediol | 0.661 | ND | ND |
| 19078-97-8 | 2,2-Dimethyl-3-heptanone | 0.003 | ND | ND |
| 18829-56-6 | (E)-2-Nonenal | 0.626 | 0.229 | ND |
| 18829-55-5 | (E)-2-Heptenal | ND | 0.037 | 0.07 |
| 18731-58-3 | (2-Methylphenyl) cyclohexanecarboxylate | ND | ND | 0.006 |
| 18679-48-6 | 2,2,4-Trimethyl-3-oxabicyclo[2.2.2]octan-5-ol | ND | 0.007 | ND |
| 18679-18-0 | (Z)-6-Dodecen-4-olide | 0.004 | ND | ND |
| 1855-09-0 | 1-Phenyl-1,2-propanediol | ND | ND | 0.01 |
| 18368-95-1 | 1,3,8-p-Menthatriene | 0.021 | ND | 0.008 |
| 18356-28-0 | Rolziracetam | ND | ND | 0.007 |
| 1824295-97-7 | O-Scetyl-N-(4-hydroxyphenyl)propanamide | ND | ND | 0.034 |
| 18172-67-3 | (-)-β-Pinene | ND | 0.661 | ND |
| 1797979-43-1 | Benzedrone | ND | 0.003 | ND |
| 17720-63-7 | N,N,O-Triacetylhydroxylamine | 0.303 | ND | ND |
| 17699-16-0 | DL-cis-Sabinene-hydrate | 0.478 | ND | ND |
| 17699-14-8 | α-Cubebene | 0.044 | ND | ND |
| 17540-75-9 | 2,6-Di-tert-Butyl-4-sec-butylphenol | ND | ND | 0.005 |
| 17398-16-2 | 2,3,5-Trimethyl-6-ethylpyrazine | ND | ND | ND |
| 1733-40-0 | (E)-N-Phenylbut-2-enamide | ND | ND | 0.008 |
| 17312-57-1 | 3-Methyl-dodecane | ND | 0.033 | ND |
| 17038-28-7 | 1,3-Diazabicyclo[3.1.0]hexane | ND | ND | 0.088 |
| 16982-00-6 | 1-Methyl-4-[(1R)-1,2,2-trimethylcyclopentyl]benzene | ND | ND | 0.036 |
| 1686-20-0 | p-Mentha-1,5-dien-8-ol | 0.003 | ND | ND |
| 1679-49-8 | 4-Methyloxolan-2-one | 0.013 | ND | ND |
| 16747-30-1 | 2,4,4-Trimethyl-hexane | 0.008 | ND | ND |
| 16729-01-4 | 4,7-Dimethyl-1-propan-2-yl-1,2,3,5,6,8a-hexahydronaphthalene | 0.239 | ND | 0.095 |
| 166273-37-6 | Pentanoic acid, 5-hydroxy-, p-t-butylphenyl ester | ND | ND | 0.014 |
| 16624-02-5 | 2-Cycloheptyl-propan-2-ol | 0.004 | ND | ND |
| 1653-40-3 | 3,5,5-Trimethyl-hexanoic acid | 0.037 | ND | ND |
| 1636-34-6 | 2,3-Diphenylbutane-2,3-diol | ND | ND | 0.006 |
| 1632-83-3 | 1-Methylbenzimidazole | 0.008 | ND | ND |
| 162710-50-1 | 3,8-Dibenzoyl-1-nitro-3,6,8-triazabicyclo[4.3.1]decane | ND | ND | 0.024 |
| 162376-82-1 | 2,6,6-Trimethylcyclohexa-1,4-dienecarbaldehyde | ND | ND | 0.051 |
| 161050-58-4 | Methoxyfenozide | ND | 0.005 | ND |
| 158612-68-1 | 4-Hydroxy-alpha-Thujone | ND | ND | 0.026 |
| 15798-64-8 | (Z)-2-Butenal | 0.008 | ND | ND |
| 1560-96-9 | 2-Methyltridecane | 0.136 | ND | ND |
| 1560-95-8 | 2-Methyl-tetradecane | 0.124 | ND | ND |
| 1558-17-4 | 4,6-Dimethylpyrimidine | ND | ND | 0.047 |
| 15537-55-0 | Sabinene hydrate | ND | 0.08 | ND |
| 15466-94-1 | trans-1,3-Dimethylcyclohexanol | ND | ND | 0.006 |
| 1540-35-8 | 3-n-Propyl-2,4-pentanedione | 0.047 | ND | ND |
| 1515-95-3 | 4-Ethylanisole | 0.001 | ND | ND |
| 1504-74-1 | (E)-2-Methoxycinnamaldehyde | 0.027 | ND | ND |
| 150320-52-8 | 1,2,3,5,6,7,8,8a-Octahydro-1-methyl-6-methylene-4-(1-methylethyl)naphthalene | ND | ND | 0.032 |
| 14912-44-8 | Ylangene | 0.019 | ND | ND |
| 1487-15-6 | 5-Methyl-2,3-dihydrofuran | 0.009 | ND | ND |
| 14811-95-1 | 1,19-Eicosadiene | ND | ND | 0.006 |
| 1470-94-6 | Indan-5-ol | 0.001 | ND | 0.039 |
| 14667-55-1 | 2,3,5-Trimethylpyrazine | 0.004 | ND | 0.013 |
| 1461-02-5 | Dihydrocurcumene | 0.005 | ND | ND |
| 14376-79-5 | 3,3,5,5-Tetramethylcyclohexanone | 0.004 | ND | 0.014 |
| 14371-10-9 | (E)-Cinnamaldehyde | 2.331 | 0.025 | 9.235 |
| 14309-57-0 | 3-Nonen-2-one | 0.019 | ND | ND |
| 143-07-7 | Dodecanoic acid | 0.005 | ND | 0.008 |
| 142-92-7 | Hexyl acetate | 0.006 | ND | ND |
| 142-83-6 | (E,E)-2,4-Hexadienal | 0.122 | ND | ND |
| 142-82-5 | Heptane | 0.106 | ND | ND |
| 142-62-1 | Hexanoic acid | 0.265 | 0.079 | 0.084 |
| 142-30-3 | 2,5-Dimethyl-3-hexyne-2,5-diol | 0.033 | ND | ND |
| 141-78-6 | Ethyl Acetate | 0.866 | ND | 0.492 |
| 141-27-5 | Geranial | 0.857 | 0.658 | ND |
| 14090-87-0 | 2,4-Octanedione | 0.011 | ND | ND |
| 140-67-0 | Estragole | 1.059 | 12.513 | 1.869 |
| 13925-03-6 | 2-Ethyl-6-methylpyrazine | 0.002 | ND | ND |
| 13909-73-4 | 2',3',4' Trimethoxyacetophenone | 0.016 | ND | ND |
| 13881-91-9 | Aminomethanesulfonic acid | 0.011 | ND | ND |
| 13877-91-3 | (E)-β-Ocimene | ND | 0.289 | ND |
| 13851-11-1 | Fenchyl acetate | 0.007 | ND | ND |
| 13831-30-6 | 2-Acetoxyacetic acid | ND | ND | 1.067 |
| 13741-21-4 | 3,7-Dimethyl-octa-1,5-diene-3,7-diol | 0.025 | ND | ND |
| 137-00-8 | 4-Methyl-5-thiazole | ND | 0.027 | ND |
| 13574-81-7 | N-Cbz-glycylglycine p-nitrophenyl ester | ND | ND | 0.051 |
| 13475-82-6 | 2,2,4,6,6-Pentamethylheptane | 0.073 | ND | 0.066 |
| 13474-59-4 | (1S,5S)-4,6-Dimethyl-6-(4-methylpent-3-enyl)bicyclo[3.1.1]hept-3-ene | 0.281 | ND | ND |
| 13466-78-9 | 3-Carene | 0.11 | ND | 0.058 |
| 13434-12-3 | N-(3-Methylbutyl)acetamide | 0.007 | ND | ND |
| 134-28-1 | Guaiyl acetate | ND | ND | 0.046 |
| 13287-24-6 | 9-Methylnonadecane | ND | ND | 0.007 |
| 13023-70-6 | 5-Aminopentanamide | ND | ND | 0.027 |
| 128-50-7 | Homomyrtenol | ND | ND | 0.02 |
| 127-91-3 | β-Pinene | 0.646 | ND | ND |
| 127-19-5 | N,N-Dimethylacetamide | 0.001 | ND | ND |
| 127-07-1 | Hydroxyurea | ND | ND | 0.052 |
| 126-86-3 | 2,4,7,9-Tetramethyl-5-decyn-4,7-diol | ND | 0.029 | 0.012 |
| 126-84-1 | 2,2-Diethoxypropane | 0.001 | ND | ND |
| 124-19-6 | Nonanal | 1.104 | ND | 0.181 |
| 124-18-5 | Decane | 0.037 | ND | 0.049 |
| 124-13-0 | Octanal | 0.317 | 0.07 | 0.093 |
| 124-07-2 | Octanoic acid | 0.235 | 0.084 | 0.089 |
| 123-76-2 | 4-Oxopentanoic acid | ND | ND | 0.077 |
| 123-72-8 | Butanal | 0.017 | ND | ND |
| 123-66-0 | Ethyl Hexanoate | ND | ND | 0.003 |
| 123-56-8 | Succinimide | 0.003 | 0.003 | ND |
| 123-51-3 | Isoamylol | 0.176 | ND | ND |
| 123-38-6 | Propanal | 0.016 | ND | ND |
| 123-35-3 | β-Myrcene | 1.32 | 1.31 | ND |
| 123-32-0 | 2,5-Dimethyl pyrazine | ND | ND | 0.021 |
| 123-25-1 | Diethyl succinate | 0.002 | ND | ND |
| 123-07-9 | 4-Ethylphenol | 0.05 | ND | ND |
| 122-95-2 | 1,4-Diethoxybenzene | 0.004 | ND | ND |
| 122-84-9 | 4-Methoxyphenylacetone | 0.062 | 0.013 | ND |
| 122-78-1 | Benzeneacetaldehyde | 0.487 | 0.559 | 1.509 |
| 122685-23-8 | 2-[2-(5-Norbornenyl)oxy]-tetrahydropyran | ND | ND | 0.023 |
| 122156-02-9 | (E)-1-Allyl-2-(prop-1-en-1-yl)disulfane | ND | 0.261 | ND |
| 121-98-2 | Methyl p-anisate | 0.009 | ND | 0.02 |
| 121-44-8 | Triethylamine | 0.022 | ND | ND |
| 121-33-5 | Vanillin | 0.008 | ND | ND |
| 120-72-9 | Indole | 0.023 | ND | 0.03 |
| 1197-07-5 | trans-Carveol | 0.075 | ND | ND |
| 1197-01-9 | 2-(4-Methylphenyl)propan-2-ol | 0.048 | ND | ND |
| 1195-79-5 | Fenchone | 0.202 | 0.899 | ND |
| 1195-32-0 | 4,α-Dimethylstyrene | ND | ND | 0.032 |
| 119-36-8 | Methyl salicylate | 0.025 | 0.016 | ND |
| 1192-62-7 | 2-Acetylfuran | 0.035 | 0.026 | 0.087 |
| 1192-58-1 | N-Methylpyrrole-2-carboxaldehyde | 0.014 | 0.012 | ND |
| 1191-96-4 | Aethyl-cyclopropan | ND | ND | 0.013 |
| 118-71-8 | Maltol | 0.213 | 0.053 | 0.388 |
| 118-65-0 | Caryophyllene | 0.151 | ND | ND |
| 116-53-0 | 2-Methylbutyric acid | ND | 0.022 | ND |
| 116-09-6 | Hydroxyacetone | 0.135 | 0.044 | 0.261 |
| 115-95-7 | Linalyl acetate | 3.098 | 0.152 | 1.941 |
| 115754-80-8 | 3-(Cyclohex-1-enyl)-furan | ND | ND | 0.021 |
| 1139-30-6 | Caryophyllene oxide | 0.011 | ND | 0.014 |
| 112-44-7 | Undecanal | 0.054 | ND | ND |
| 1124-11-4 | Tetramethylpyrazine | 0.004 | ND | 0.022 |
| 112-31-2 | Decanal | 0.099 | ND | ND |
| 112-30-1 | 1-Decanol | 0.014 | ND | ND |
| 1121-60-4 | 2-Pyridinecarboxaldehyde | 0.011 | ND | ND |
| 112-12-9 | 2-Undecanone | 0.216 | 0.073 | 0.019 |
| 1120-59-8 | 2,3-Dihydrothiophene | ND | 0.004 | ND |
| 112-05-0 | Nonanoic acid | 0.271 | 0.036 | 0.113 |
| 1120-07-6 | Nonanamide | 0.002 | ND | ND |
| 111-87-5 | 1-Octanol | 0.035 | ND | 0.043 |
| 111-84-2 | Nonane | 0.044 | ND | 0.012 |
| 111-71-7 | Heptanal | 0.146 | ND | 0.052 |
| 111-70-6 | 1-Heptanol | 0.061 | ND | 0.024 |
| 111-65-9 | Octane | 0.221 | ND | ND |
| 111-27-3 | 1-Hexanol | 0.048 | ND | ND |
| 111-14-8 | Heptanoic acid | 0.248 | 0.023 | 0.042 |
| 111-13-7 | 2-Octanone | 0.004 | ND | ND |
| 110-93-0 | Sulcatone | ND | 0.023 | ND |
| 110-62-3 | Pentanal | 0.032 | ND | 0.074 |
| 110-54-3 | n-Hexane | ND | ND | 0.012 |
| 110453-78-6 | (S)-(+)-6-Methyl-1-octanol | 0.017 | ND | ND |
| 110-43-0 | 2-Heptanone | ND | ND | 0.012 |
| 110-38-3 | Ethyl decanoate | 0.052 | 0.047 | 0.003 |
| 109-66-0 | Pentane | 0.07 | ND | 0.011 |
| 109-60-4 | n-Propyl acetate | 0.003 | ND | ND |
| 109-52-4 | Pentanoic acid | ND | 0.05 | ND |
| 109-08-0 | 2-Methylpyrazine | 0.018 | ND | 0.055 |
| 108-94-1 | Cyclohexanone | 0.026 | ND | ND |
| 108342-25-2 | (2S,6R,7S,8E)-(+)-2,7-Epoxy-4,8-megastigmadiene | ND | 0.005 | ND |
| 108-24-7 | Acetic anhydride | ND | ND | 0.046 |
| 1081-77-2 | n-Nonybenzene | 0.035 | ND | ND |
| 107-92-6 | Butanoic acid | ND | ND | 0.021 |
| 107-85-7 | Isopentylamine | ND | 0.038 | ND |
| 1077-16-3 | Hexylbenzene | 0.006 | ND | 0.009 |
| 1072-83-9 | 2-Acetylpyrrole | 0.358 | 0.375 | 0.376 |
| 107-03-9 | Propyl mercaptan | 0.009 | ND | ND |
| 107-02-8 | 2-Propenal | 0.018 | ND | ND |
| 106-63-8 | Isobutyl acrylate | 0.002 | ND | ND |
| 106-44-5 | p-Cresol | 0.002 | 0.027 | 0.029 |
| 106-32-1 | Ethyl octanoate | 0.018 | ND | ND |
| 106-26-3 | Neral | 0.31 | 0.314 | ND |
| 106-25-2 | Nerol | 0.077 | ND | ND |
| 106-24-1 | Geraniol | 0.076 | 0.031 | ND |
| 105-86-2 | Geranyl formate | 0.02 | ND | ND |
| 105-85-1 | 3,7-Dimethyloct-6-en-1-yl formate | 0.036 | ND | ND |
| 105-60-2 | Caprolactam | 0.012 | 0.016 | ND |
| 105-57-7 | Acetal | 0.022 | ND | ND |
| 105-54-4 | Ethyl butyrate | ND | ND | 0.005 |
| 105-20-4 | Betazole | ND | ND | 0.015 |
| 104-54-1 | Cinnamyl alcohol | 0.037 | ND | 0.024 |
| 104-50-7 | γ-Octalactone | 0.062 | ND | 0.056 |
| 104-46-1 | Anethole | 5.098 | 12.401 | 22.82 |
| 103-82-2 | Benzeneacetic acid | 0.003 | ND | 0.025 |
| 10374-51-3 | 5-(Hydroxymethyl)dihydrofuran-2(3H)-one | 0.013 | ND | ND |
| 103619-06-3 | (Z)-2,6-dimethyl-2,7-Octadiene-1,6-diol | 0.031 | ND | ND |
| 103-54-8 | Ciamyl acetate | 0.047 | ND | 0.029 |
| 103-45-7 | Phenethyl Acetate | 0.046 | ND | ND |
| 103-36-6 | Ethyl cinnamate | 0.001 | ND | ND |
| 10230-62-3 | 2,4-Dihydroxy-2,5-dimethyl-3(2H)-furan-3-one | ND | 0.051 | ND |
| 102-20-5 | Phenethyl 2-phenylacetate | ND | ND | ND |
| 10192-32-2 | 1-Tetracosene | ND | ND | 0.002 |
| 10139-84-1 | 2',4'-Dihydroxy-3'-methylacetophenone | 0.001 | ND | ND |
| 1010329-73-6 | O-(4-Butylbenzoyl)-O'-(isobutoxycarbonyl)-1,2-benzenediol | ND | 0.023 | ND |
| 1010193-07-6 | 5a-Methoxy-9a-methyl-3,4,5a,6,7,8,9a,10-octahydropyrano[4,3-b]chromene-1,9-dione | 0.046 | ND | ND |
| 1009-14-9 | Valerophenone | 0.025 | ND | ND |
| 100-52-7 | Benzaldehyde | 0.106 | 0.151 | ND |
| 1003-29-8 | 1H-Pyrrole-2-carboxaldehyde | 0.007 | ND | 0.031 |
| 100-51-6 | Benzyl alcohol | 0.004 | 0.025 | ND |
| 100-42-5 | Styrene | 0.02 | ND | 0.043 |
| 100-41-4 | Ethylbenzene | ND | ND | 0.039 |

Volatiles compounds of the HG-12 sample were detected by GC-MS, GC-Q-TOF/MS, and GC-Orbitrap-MS. ND means not detected. The relative content of each compound was calculated by peak area normalization.
